# Supplementary material
Source: PubMed Central journal article supplement (PMC4902605)
Supplement: supp_pp.16.00213_PP2016-00213R1_Supplemental_Figure_2.pdf [file supp_pp.16.00213_PP2016-00213R1_Supplemental_Figure_2.pdf]

### Early embryo development lines

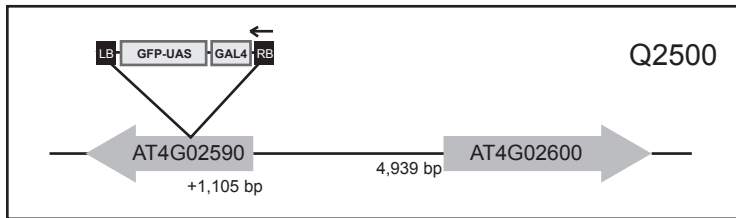

### Embryonic RAM lines (continued)

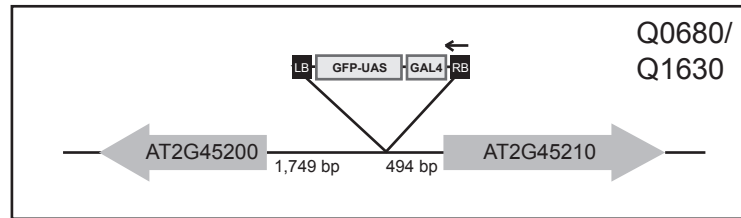

### Late embryo development lines

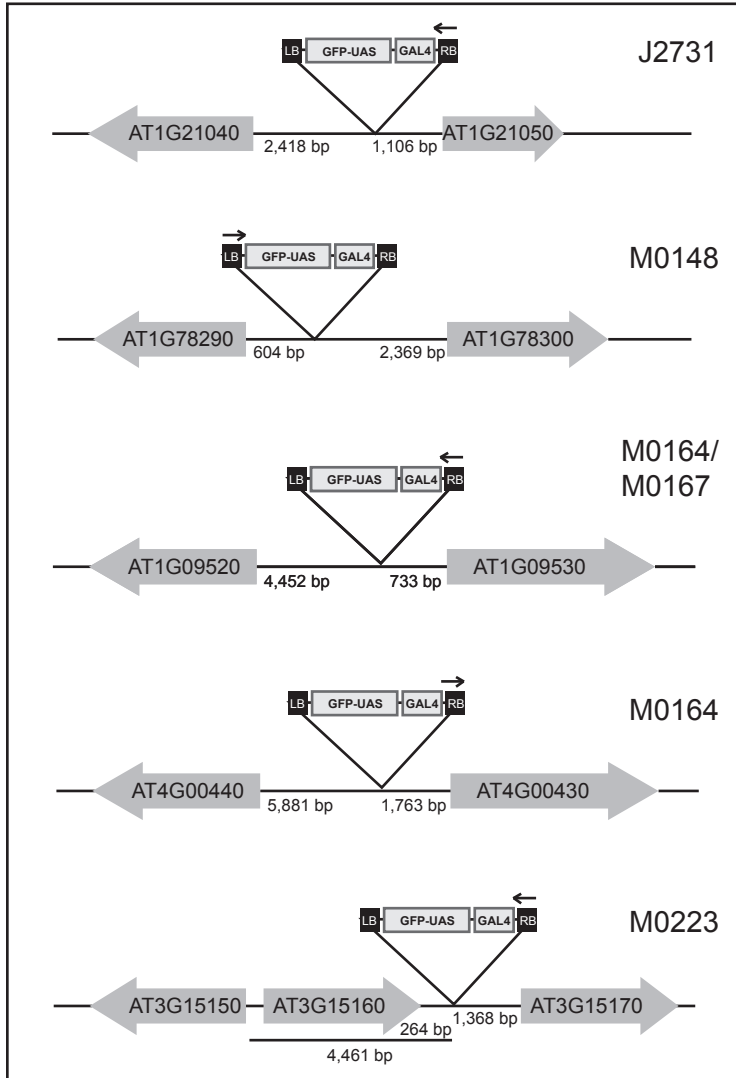

### Other lines

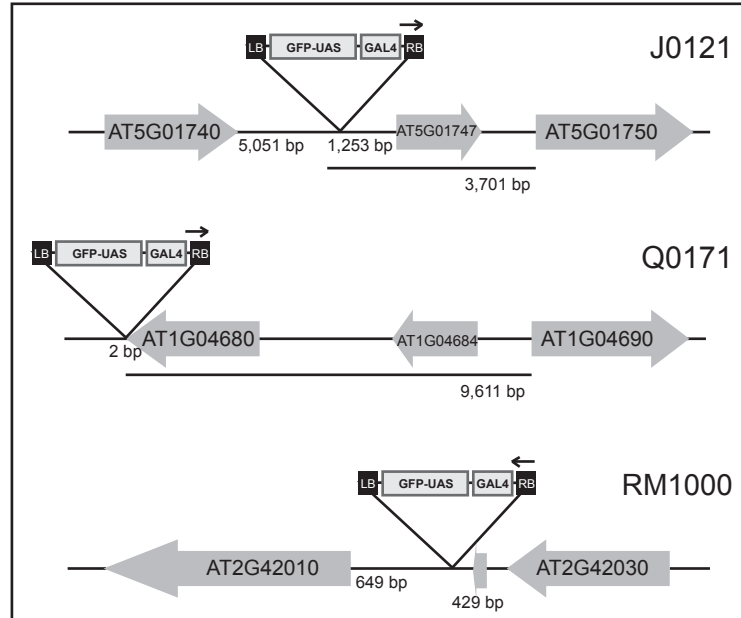

### No expression lines

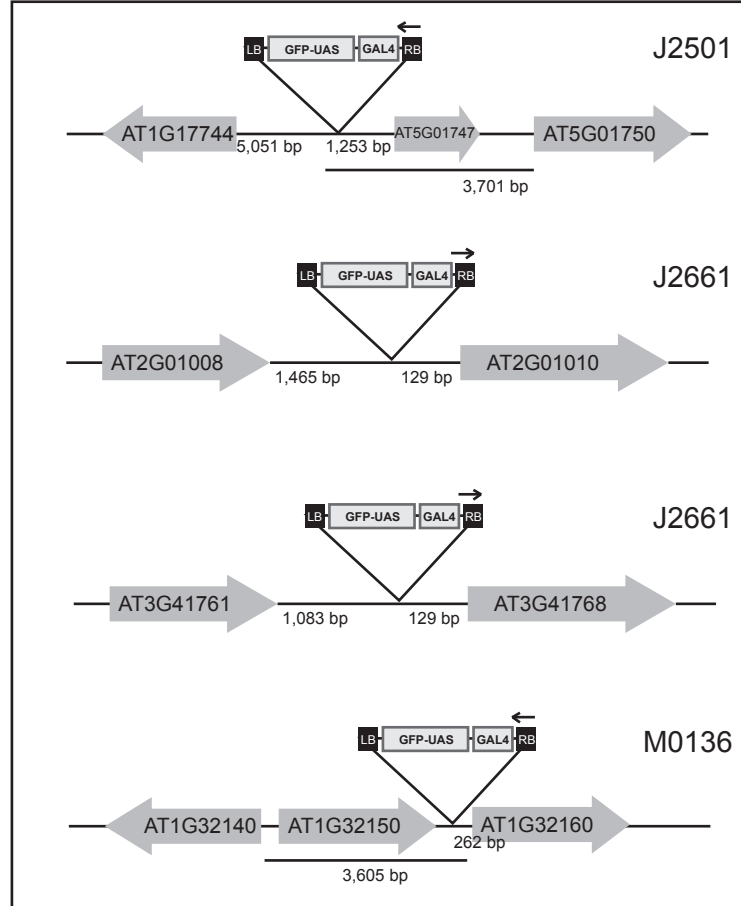

### Embryonic RAM lines

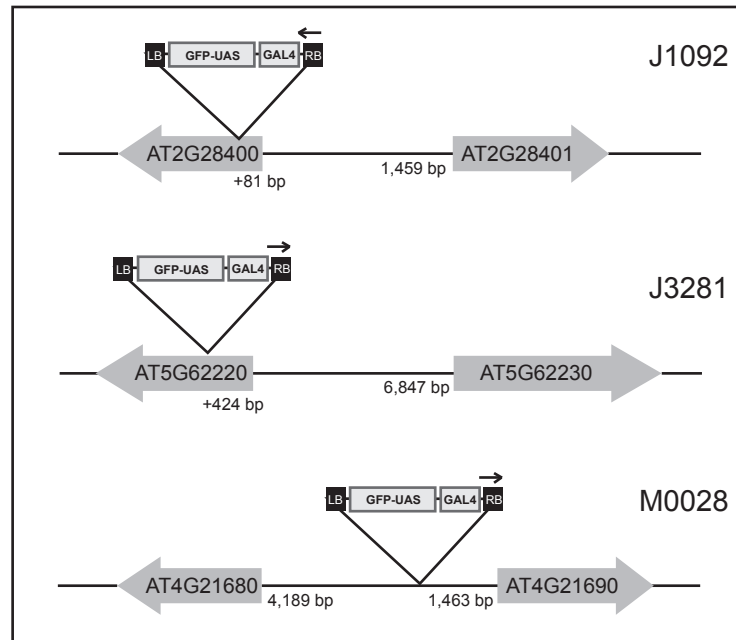

Suppl. Fig. 2
