# Supplementary material
Source: PubMed Central journal article supplement (PMC4902605)

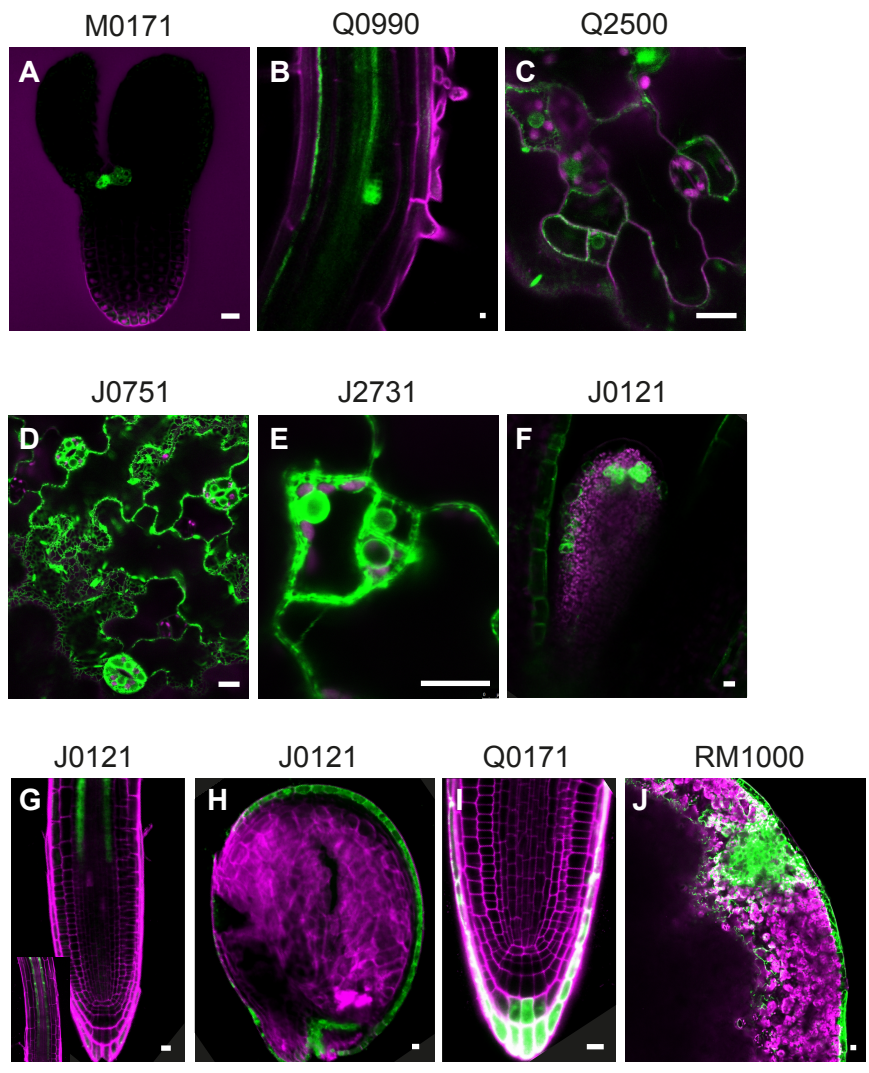

Suppl. Fig. 1

Supplement: supp_pp.16.00213_PP2016-00213R1_Supplemental_Figure_1.pdf [file supp_pp.16.00213_PP2016-00213R1_Supplemental_Figure_1.pdf]
